# Supplementary material for: Investigation of the luminescence properties and energy transfer mechanisms in Gd3TaO7:Bi3+,Eu3+ phosphors for their potential application in full-spectrum WLEDs
Source: Royal Society of Chemistry journal article supplement (doi:10.1039/d3dt02065g), 2023-01-01
Supplement: d3dt02065g1.pdf [file d3dt02065g1.pdf]

### Supporting information

**Investigation of the luminescent properties and energy transfer mechanisms in  $\text{Gd}_3\text{TaO}_7$ :  $\text{Bi}^{3+}$ ,  $\text{Eu}^{3+}$  phosphors for their potential application in full-spectrum w-LEDs.**

Zhicheng Liao<sup>a</sup>, Liting Qiu<sup>b</sup>, Qian Zhang<sup>b</sup>, Xiantao Wei<sup>c</sup>, Yonghu Chen<sup>\*b</sup>, Min Yin<sup>\*b</sup>

<sup>a</sup> CAS Key Laboratory of Microscale Magnetic Resonance, and School of Physical Sciences, University of Science and Technology of China, Hefei 230026, China

<sup>b</sup> Key Laboratory of Strongly-Coupled Quantum Matter Physics, Chinese Academy of Sciences, School of Physical Sciences, University of Science and Technology of China, Hefei 230026, PR China

<sup>c</sup> Physics Experiment Teaching Center, School of Physical Sciences, University of Science and Technology of China, Hefei 230026, PR China

**\* Corresponding authors.**

E-mail addresses: yhuchen@ustc.edu.cn (Y. Chen), yinmin@ustc.edu.cn (M. Yin)

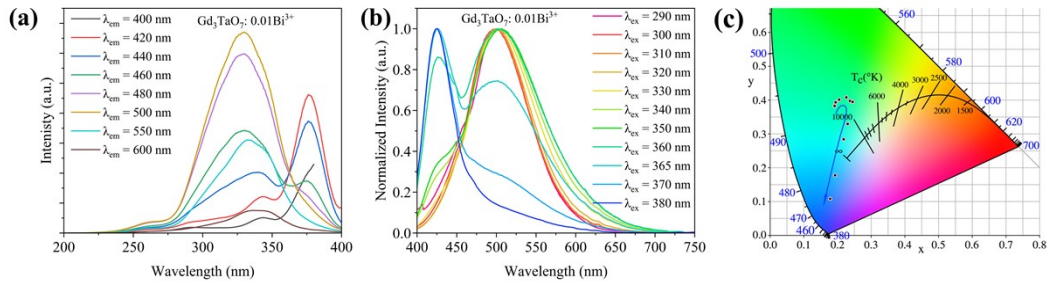

Fig. S1 (a) Excitation spectra of  $\text{Gd}_3\text{TaO}_7: 0.01\text{Bi}^{3+}$  with monitoring wavelengths ranging from 400 nm to 600 nm (b) Normalized emission spectra of  $\text{Gd}_3\text{TaO}_7: 0.01\text{Bi}^{3+}$  under excitation wavelengths ranging from 300 nm to 380 nm, (c) The color coordinates of  $\text{Gd}_3\text{TaO}_7: 0.01\text{Bi}^{3+}$  change with excitation wavelengths in the range of 300 – 380 nm.

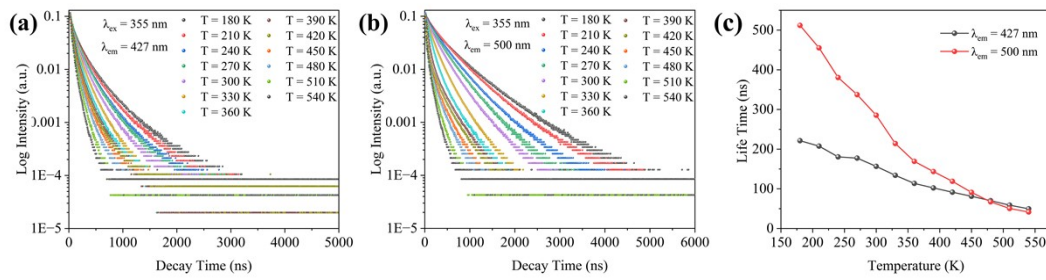

Fig. S2 Fluorescence decay curves of  $\text{Gd}_3\text{TaO}_7: 0.01\text{Bi}^{3+}$  monitored at 427 nm (a) and 500 nm (b) in the temperature range of 180 – 540 K, (c) The temperature dependence of the life time of  $\text{Gd}_3\text{TaO}_7: 0.01\text{Bi}^{3+}$  monitored at 427 nm and 500 nm.

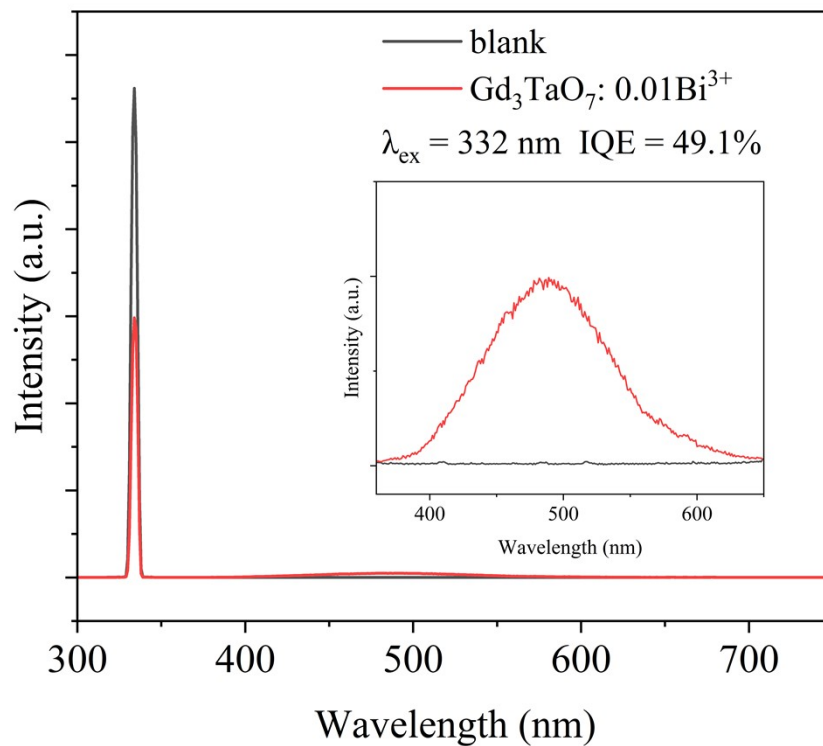

Fig. S3 IQE-based PL spectrum of  $\text{Gd}_3\text{TaO}_7: 0.01\text{Bi}^{3+}$ .

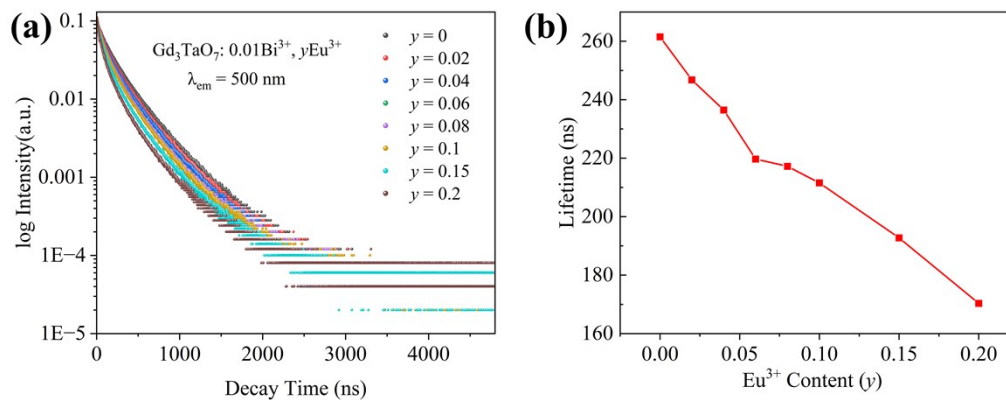

Fig. S4 (a) Room Temperature fluorescence decay curves of  $\text{Gd}_3\text{TaO}_7: 0.01\text{Bi}^{3+}, y\text{Eu}^{3+}$  ( $y = 0 - 0.2$ ) monitored at 500 nm, (b) The dependence of lifetime of  $\text{Gd}_3\text{TaO}_7: 0.01\text{Bi}^{3+}, y\text{Eu}^{3+}$  with  $\text{Eu}^{3+}$  concentration monitored at 500 nm.

Table. S1 Refinement and crystallographic parameters of  $\text{Gd}_3\text{TaO}_7$  and  $\text{Gd}_3\text{TaO}_7: 0.01\text{Bi}^{3+}$

| □                         | Gd <sub>3</sub> TaO <sub>7</sub> | Gd <sub>3</sub> TaO <sub>7</sub> : 0.01Bi <sup>3+</sup> |
|---------------------------|----------------------------------|---------------------------------------------------------|
| Space Group               | C2221                            | C2221                                                   |
| a (Å)                     | 10.6270                          | 10.6303                                                 |
| b (Å)                     | 7.5200                           | 7.5237                                                  |
| c (Å)                     | 7.5396                           | 7.5429                                                  |
| $\alpha=\beta=\gamma$ (°) | 90                               | 90                                                      |
| V (Å <sup>3</sup> )       | 602.5232                         | 603.2696                                                |
| R <sub>p</sub> (%)        | 9.57                             | 9.37                                                    |
| R <sub>wp</sub> (%)       | 10.8                             | 10.6                                                    |
| $\chi^2$                  | 2.32                             | 2.23                                                    |
